# Supplementary material for: Downregulation of Heat Shock Protein 70 Impairs Osteogenic and Chondrogenic Differentiation in Human Mesenchymal Stem Cells
Source: PubMed Central journal article supplement (PMC5765044; doi:10.1038/s41598-017-18541-1), 2018-01-11
Supplement: 41598_2017_18541_MOESM1_ESM.pdf [file 41598_2017_18541_MOESM1_ESM.pdf]

# Supplementary Materials

## **Downregulation of Heat Shock Protein 70 Impairs Osteogenic and Chondrogenic Differentiation in Human Mesenchymal Stem Cells**

Chenghai Li, Kristifor Sunderic, Steven B. Nicoll and Sihong Wang\*

**\*Corresponding author:**

Sihong Wang, Ph.D.  
Biomedical Engineering Department, Steinman Hall 434  
City College of New York  
160 Convent Avenue  
New York, NY 10031  
USA

Phone: 212-650-5189  
Fax: 212-650-6727  
Email: [shwang@ccny.cuny.edu](mailto:shwang@ccny.cuny.edu)

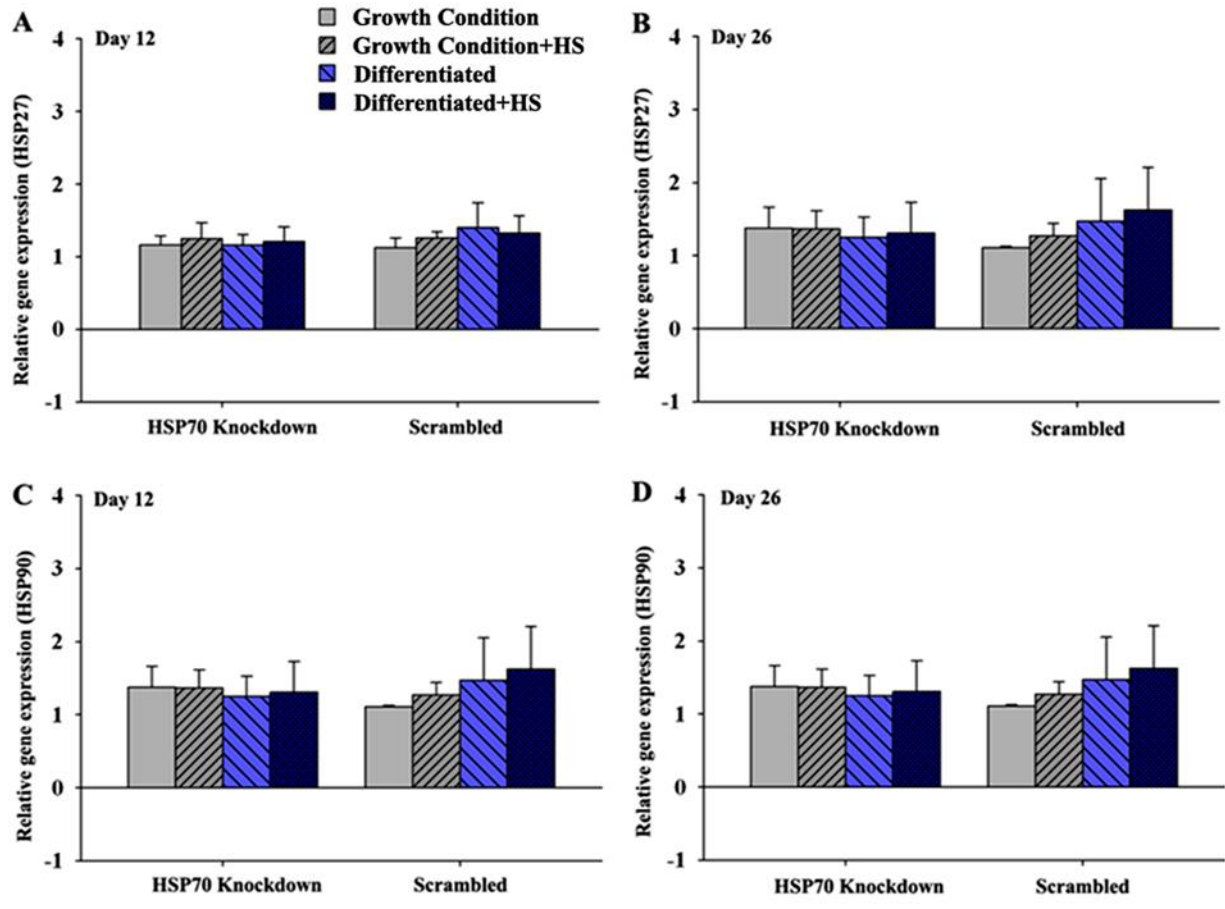

**Figure S1.** HSP27 and HSP90 expression measured by Real-time RT-PCR in hMSCs during the growth and differentiation at Day 12 (A and C) and Day 26 (B and D).

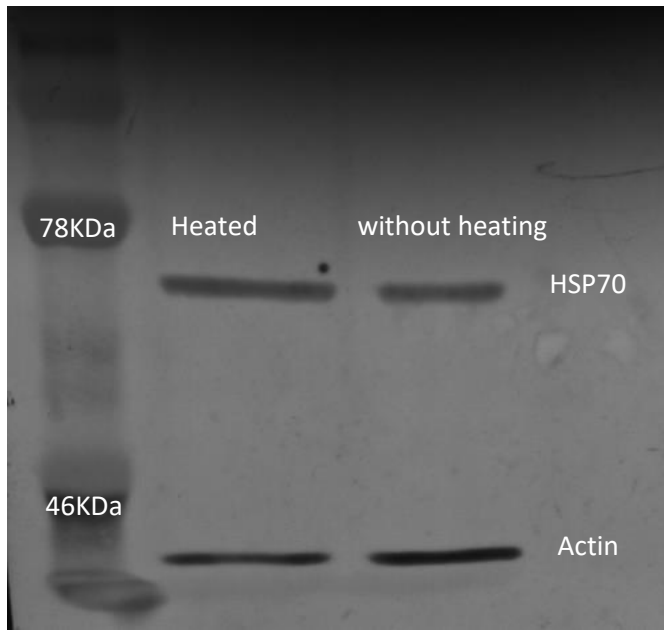

**Figure S2.** Western Blot membrane of Figure 1A.

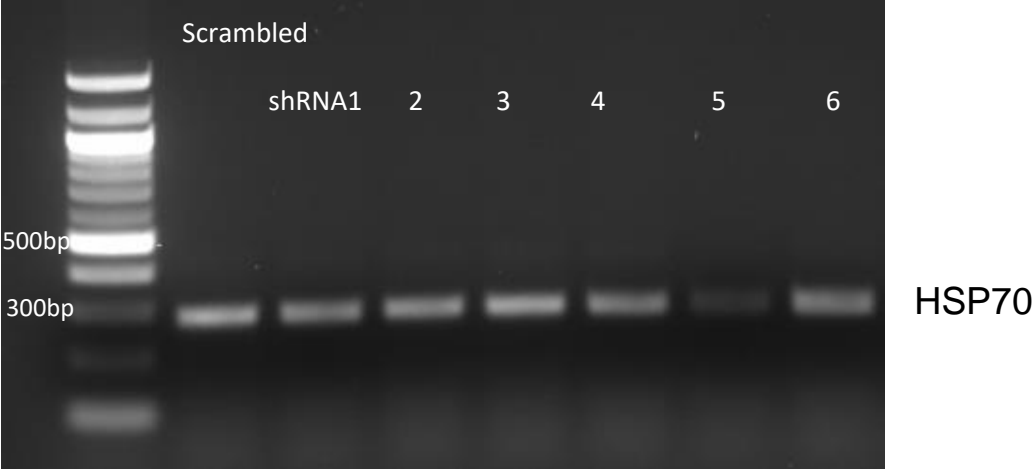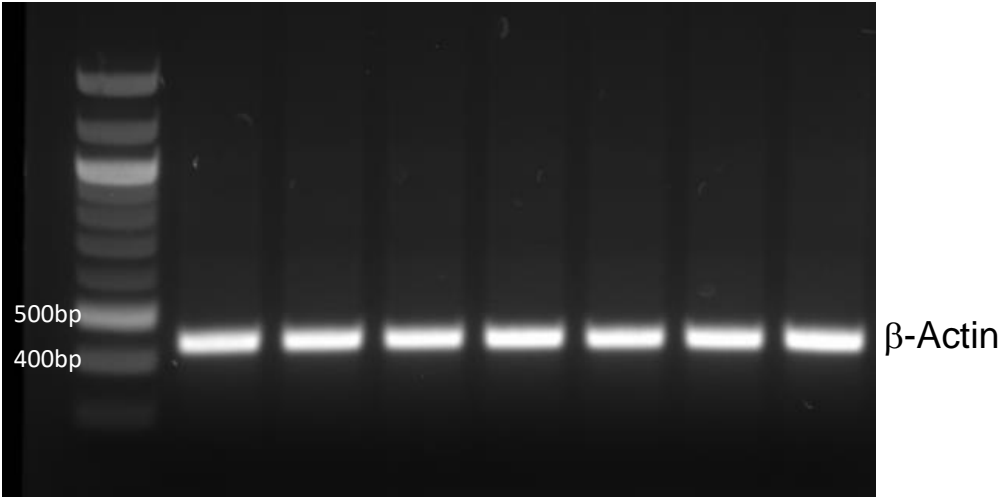

**Figure S3.** Full DNA gel images of Figure 2A.

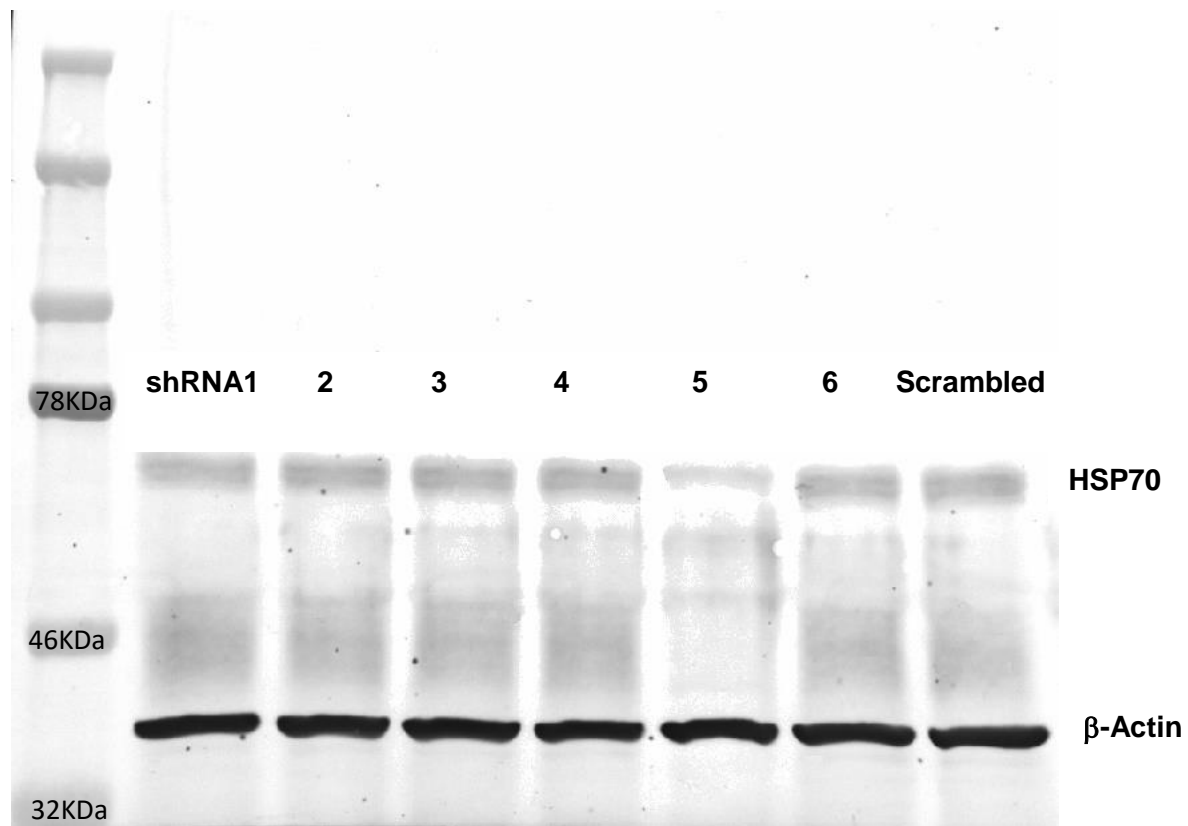

**Figure S4.** Full Western Blot membrane of Figure 2B.

Table S1. Alkaline Phosphatase Activity (Unit<sup>†</sup>)

|                       | Scrambled    | HSP70 Knockdown | Reduction (%) |
|-----------------------|--------------|-----------------|---------------|
| <b>Day 6</b>          |              |                 |               |
| Growth Condition      | 54.44±3.37   | 39.40±9.20      | 60.70         |
| Growth Condition+HS * | 58.26±0.36   | 43.92±8.42      |               |
| Differentiated        | 99.54±19.18  | 39.14±2.25      |               |
| Differentiated+HS *   | 156.76±20.32 | 45.30±0.87      |               |
|                       |              |                 | 71.07         |
| <b>Day 12</b>         |              |                 |               |
| Growth Condition      | 76.42±11.82  | 59.53±2.30      | 18.72         |
| Growth Condition+HS * | 85.46±12.80  | 70.65±4.55      |               |
| Differentiated        | 104.30±14.61 | 84.78±11.08     |               |
| Differentiated+HS *   | 149.09±14.96 | 107.45±14.61    |               |
|                       |              |                 | 27.93         |

<sup>†</sup>One enzyme unit of ALP is the amount of enzyme which releases 1 nmol p-nitrophenol per 15 minutes. Each sample had 10<sup>4</sup> seeded hMSCs. HS: heat shock; \**P*<0.05; \*\**P*<0.01. N=4.

Table S2. Calcium Deposition ( $\mu\text{g}/10^4$  seeded hMSCs)

|                       | <b>Scrambled</b>   | <b>HSP70 Knockdown</b> | <b>Reduction (%)</b> |
|-----------------------|--------------------|------------------------|----------------------|
| <b>Day 19</b>         |                    |                        |                      |
| Growth Condition      | 20.94 $\pm$ 7.10   | 14.66 $\pm$ 4.12       |                      |
| Growth Condition+HS * | 16.56 $\pm$ 5.37   | 16.24 $\pm$ 7.23       | *                    |
| Differentiated        | 173.78 $\pm$ 13.03 | 43.88 $\pm$ 12.51      | ** 74.75             |
| Differentiated+HS *   | 202.26 $\pm$ 6.87  | 83.11 $\pm$ 10.96      | ** 58.91             |
| <b>Day 26</b>         |                    |                        |                      |
| Growth Condition      | 61.73 $\pm$ 3.60   | 51.14 $\pm$ 6.95       |                      |
| Growth Condition+HS * | 70.48 $\pm$ 10.22  | 55.58 $\pm$ 7.52       | *                    |
| Differentiated        | 275.57 $\pm$ 5.65  | 160.29 $\pm$ 10.45     | ** 41.84             |
| Differentiated+HS *   | 306.43 $\pm$ 11.10 | 186.37 $\pm$ 12.17     | ** 39.18             |

\* $P < 0.05$ ; \*\* $P < 0.01$ . N=4.
